# Supplementary material
Source: PubMed Central journal article supplement (PMC397388)
Supplement: pnas_101_15_5374__1.pdf [file pnas_101_15_5374__1.pdf]

## Data Set 1. Crystal and structure refinement for *Hira08*

|                                        |                                                                                                                       |                            |
|----------------------------------------|-----------------------------------------------------------------------------------------------------------------------|----------------------------|
| Identification Code                    | Hira08                                                                                                                |                            |
| Empirical formula                      | C <sub>12</sub> H <sub>14</sub> BrNO <sub>2</sub>                                                                     |                            |
| Formula weight                         | 284.15                                                                                                                |                            |
| Temperature                            | 100 K                                                                                                                 |                            |
| Wavelength                             | 0.71073 Å                                                                                                             |                            |
| Crystal system                         | Monoclinic                                                                                                            |                            |
| Space Group                            | P2 <sub>1</sub>                                                                                                       |                            |
| Unit cell dimensions                   | $a = 10.450(6)$ Å                                                                                                     | $\alpha = 90.0^\circ$      |
|                                        | $b = 8.994(5)$ Å                                                                                                      | $\beta = 101.167(8)^\circ$ |
|                                        | $c = 13.245(7)$ Å                                                                                                     | $\gamma = 90.0^\circ$      |
| Volume                                 | 1221.3(11) Å <sup>3</sup>                                                                                             |                            |
| Z                                      | 4                                                                                                                     |                            |
| Density (calculated)                   | 1.545 Mg/m <sup>3</sup>                                                                                               |                            |
| Absorption coefficient                 | 3.351 mm <sup>-1</sup>                                                                                                |                            |
| $F(000)$                               | 576                                                                                                                   |                            |
| Crystal size, color, habit             | 0.40 × 0.25 × 0.05 mm, clear, plate                                                                                   |                            |
| Theta range for data collection        | 1.99 – 25.03°                                                                                                         |                            |
| Index ranges                           | –12 ≤ $h$ ≤ 12, –10 ≤ $k$ ≤ 10, –15 ≤ $l$ ≤ 15                                                                        |                            |
| Reflections collected                  | 11,677                                                                                                                |                            |
| Independent reflections                | 4,306 ( $R_{\text{int}} = 0.0379$ )                                                                                   |                            |
| Reflections with $I > 4\sigma(F_o)$    | 3,836                                                                                                                 |                            |
| Flack parameter                        | 0.0212(0.009)                                                                                                         |                            |
| Absorption correction                  | SADABS based on redundant diffractions                                                                                |                            |
| Maximum/minimum transmission           | 1.0/0.594                                                                                                             |                            |
| Refinement method                      | Full-matrix least squares on $F^2$                                                                                    |                            |
| Weighting scheme                       | $w = q [\sigma^2 (F_o^2) + (aP)^2 + bP]^{-1}$ where:<br>$P = (F_o^2 + 2F_c^2)/3$ , $a = 0.0521$ , $b = 0.0$ , $q = 1$ |                            |
| Data/restraints/parameters             | 4,306/1/289                                                                                                           |                            |
| Goodness of fit on $F^2$               | 0.994                                                                                                                 |                            |
| Final $R$ indices [ $I > 2\sigma(I)$ ] | $R1 = 0.0380$ , $wR2 = 0.0877$                                                                                        |                            |
| $R$ indices (all data)                 | $R1 = 0.0423$ , $wR2 = 0.0889$                                                                                        |                            |
| Largest difference: peak and hole      | 0.961, –0.294 eÅ <sup>-3</sup>                                                                                        |                            |
