# Supplementary material
Source: PubMed Central journal article supplement (PMC397388)

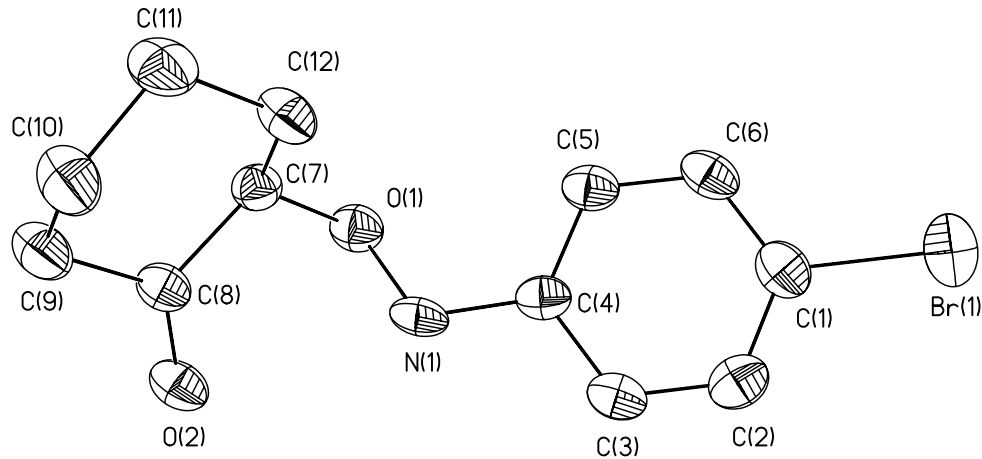

Supplement: pnas_101_15_5374__3.pdf [file pnas_101_15_5374__3.pdf]

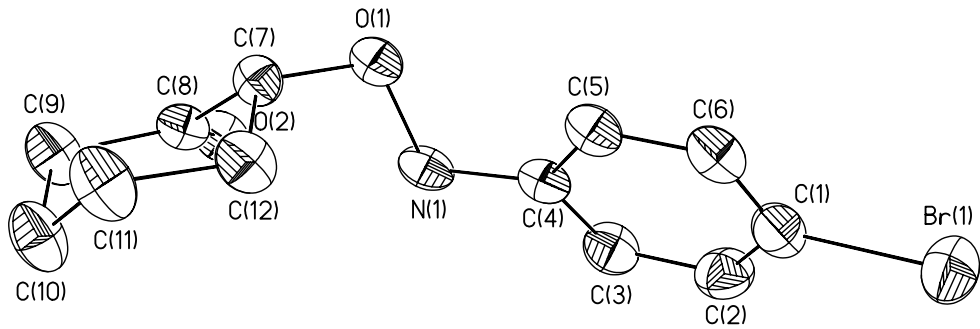

Supplement: pnas_101_15_5374__5.pdf [file pnas_101_15_5374__5.pdf]

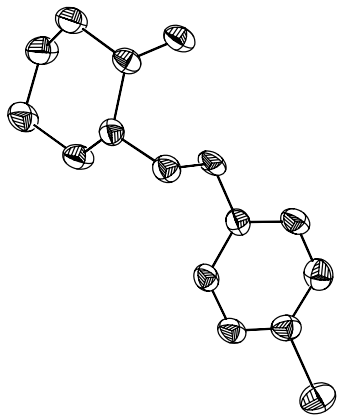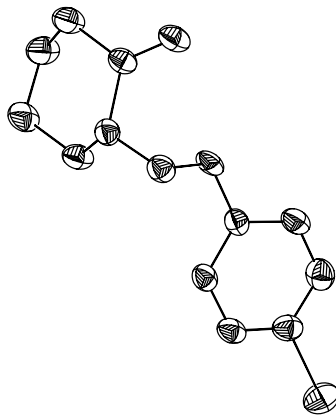

Supplement: pnas_101_15_5374__7.pdf [file pnas_101_15_5374__7.pdf]

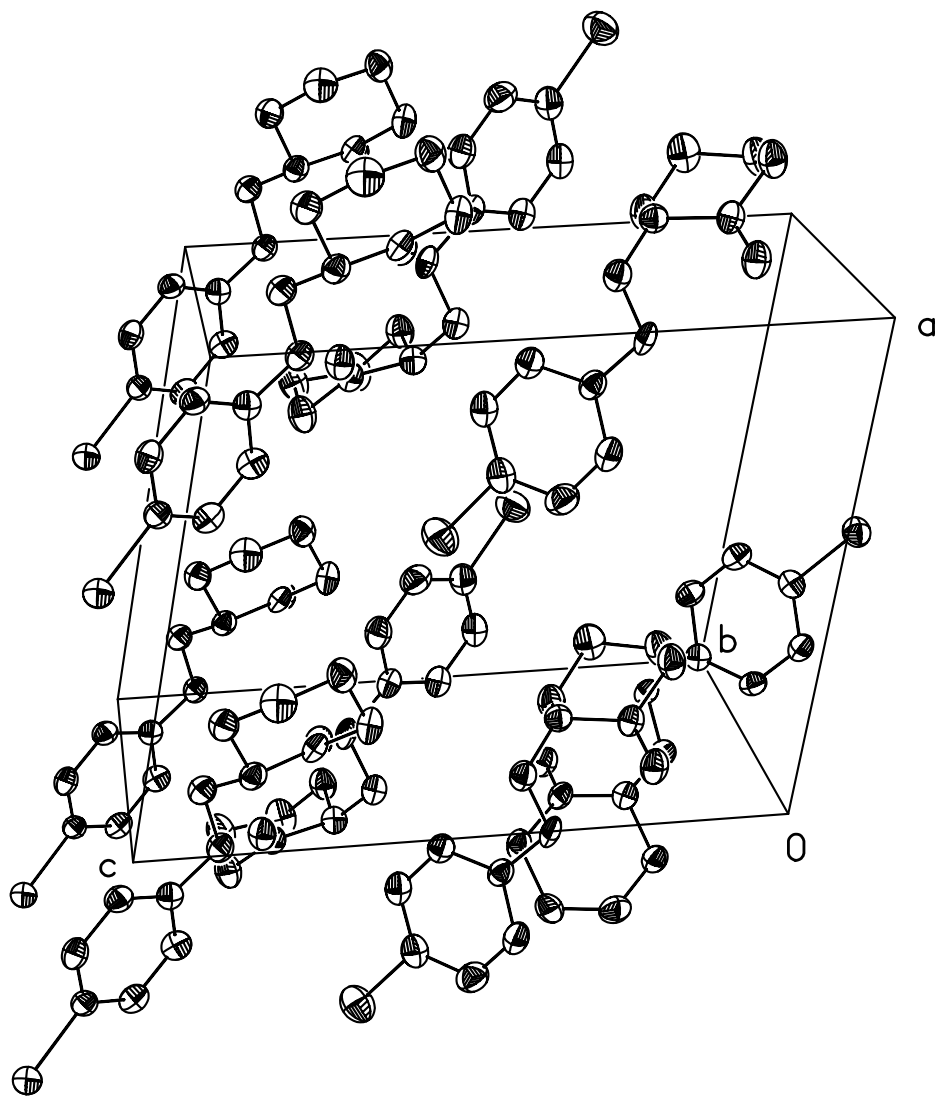

Supplement: pnas_101_15_5374__9.pdf [file pnas_101_15_5374__9.pdf]
